# Supplementary material
Source: Springer Nature journal article supplement (https://www.springermedizin.de/resource/supplementary/12916_2008_188_MOESM3_ESM.pdf/9599372)
Supplement: MOESM3 [file 9599372]

Total citations identified from electronic searches

n= 541

Citations excluded after screening titles and/or abstracts: n= 378

Articles of accuracy of proteinuria in predicting maternal and fetal complications in women with pre eclampsia retrieved for detailed evaluation n=173

From electronic searches

n= 163

From reference lists

n= 10

Articles excluded with reasons

Inappropriate population

n=47

Data not extractable

n=48

Inappropriate outcome

n=10

Lack of original data i.e. reviews or letters

n=9

Inappropriate test

n=33

Case control studies

n=10

Total excluded

n=157

Primary articles included in systematic review

n=16
